# Supplementary material
Source: publisher figshare collection journal article supplement (https://diabetesjournals.figshare.com/ndownloader/files/32606747)
Supplement: Supplementary file 1 [file 32606747]

Supplemental Table 6. Interaction of PS and SNPs with treatment arm in predicting with one year change in WCadjBMI in African American participants
Marker	rs number		k	beta	se	lower	upper	Z	pval	I2	pval.Q		bon_p	fdr_p
PS: Full sample			2	-0.009	0.012	-0.033	0.016	-0.698	0.485	0
PS: Women			2	0.006	0.016	-0.024	0.037	0.404	0.686	0
PS: Men			2	-0.015	0.016	-0.046	0.016	-0.963	0.335	0
snp1	rs2645294		2	0.02	0.017	-0.012	0.053	1.242	0.214	0	0.462		1	0.919
snp2	rs905938		2	-0.013	0.019	-0.049	0.024	-0.668	0.504	0	0.426		1	0.919
snp3	rs10919388		2	-0.005	0.018	-0.04	0.03	-0.282	0.778	0.04	0.307		1	0.919
snp4	rs714515		2	-0.011	0.022	-0.054	0.033	-0.471	0.638	0	0.345		1	0.919
snp5	rs2820443		2	-0.014	0.032	-0.078	0.049	-0.45	0.653	0.526	0.146		1	0.919
snp6	rs1385167		2	0.006	0.02	-0.033	0.044	0.298	0.765	0	0.582		1	0.919
snp7	rs10195252		2	-0.002	0.018	-0.037	0.034	-0.101	0.919	0	0.711		1	0.919
snp8	rs1569135		2	-0.003	0.017	-0.037	0.031	-0.181	0.856	0.092	0.294		1	0.919
snp9	rs17819328		2	0.024	0.02	-0.016	0.064	1.166	0.244	0.594	0.117		1	0.919
snp10	rs2276824		2	0.008	0.019	-0.028	0.045	0.45	0.653	0	0.427		1	0.919
snp11	rs2371767		2	-0.01	0.016	-0.042	0.021	-0.642	0.521	0.157	0.276		1	0.919
snp12	rs10804591		2	0.024	0.017	-0.008	0.057	1.47	0.141	0.231	0.254		1	0.919
snp13	rs17451107		2	-0.013	0.018	-0.048	0.022	-0.729	0.466	0	0.975		1	0.919
snp14	rs3805389		2	0.003	0.023	-0.041	0.047	0.122	0.903	0	0.887		1	0.919
snp15	rs9991328		2	0.019	0.017	-0.015	0.052	1.091	0.275	0.225	0.256		1	0.919
snp16	rs303084		2	-0.003	0.017	-0.036	0.029	-0.191	0.848	0	0.873		1	0.919
snp17	rs9687846		2	0.012	0.02	-0.026	0.051	0.64	0.522	0	0.637		1	0.919
snp18	rs1045241		2	-0.004	0.017	-0.038	0.03	-0.233	0.816	0	0.544		1	0.919
snp19	rs7705502		2	-0.007	0.029	-0.064	0.051	-0.233	0.815	0	0.465		1	0.919
snp20	rs6556301		2	0.003	0.02	-0.035	0.041	0.162	0.872	0	0.486		1	0.919
snp21	rs1294410		2	0.01	0.02	-0.028	0.048	0.521	0.603	0.761	0.041		1	0.919
snp22	rs7759742		1	0.011	0.023	-0.035	0.057	0.468	0.64	NA	NA		1	0.919
snp23	rs1776897		2	0.018	0.017	-0.015	0.051	1.076	0.282	0	0.641		1	0.919
snp24	rs1358980		2	-0.003	0.021	-0.043	0.038	-0.123	0.902	0.654	0.089		1	0.919
snp25	rs1936805		2	-0.039	0.018	-0.074	-0.004	-2.172	0.03	0	0.325		1	0.587
snp26	rs10245353		2	-0.049	0.036	-0.119	0.021	-1.37	0.171	0	0.988		1	0.919
snp27	rs7801581		2	-0.004	0.02	-0.042	0.034	-0.209	0.835	0	0.614		1	0.919
snp28	rs7830933		2	-0.007	0.018	-0.044	0.029	-0.406	0.685	0.51	0.153		1	0.919
snp29	rs12679556		2	-0.022	0.017	-0.056	0.011	-1.311	0.19	0	0.788		1	0.919
snp30	rs10991437		2	-0.048	0.039	-0.123	0.028	-1.242	0.214	0	0.398		1	0.919
snp31	rs7917772		2	0.011	0.017	-0.023	0.045	0.623	0.533	0.487	0.163		1	0.919
snp32	rs11231693		2	0.035	0.02	-0.005	0.075	1.716	0.086	0	0.618		1	0.919
snp33	rs10842707		2	0.031	0.032	-0.032	0.094	0.952	0.341	0	0.486		1	0.919
snp34	rs1443512		2	-0.01	0.017	-0.042	0.023	-0.579	0.562	0	0.428		1	0.919
snp35	rs4765219		2	0.01	0.018	-0.026	0.046	0.538	0.59	0	0.84		1	0.919
snp36	rs8042543		2	0.039	0.031	-0.022	0.101	1.243	0.214	0	0.647		1	0.919
snp37	rs8030605		2	0.018	0.03	-0.041	0.078	0.606	0.544	0.3	0.232		1	0.919
snp38	rs1440372		2	-0.007	0.024	-0.054	0.04	-0.285	0.776	0.366	0.209		1	0.919
snp39	rs2925979		2	-0.044	0.018	-0.078	-0.009	-2.497	0.013	0.721	0.058		0.74	0.37
snp40	rs4646404		2	-0.013	0.028	-0.068	0.042	-0.474	0.635	0.157	0.276		1	0.919
snp41	rs8066985		2	0.013	0.017	-0.021	0.046	0.745	0.456	0.644	0.094		1	0.919
snp42	rs12454712		2	0.039	0.019	0.001	0.077	2.022	0.043	0	0.657		1	0.637
snp43	rs12608504		2	-0.005	0.018	-0.039	0.03	-0.272	0.786	0	0.385		1	0.919
snp44	rs4081724		2	-0.014	0.04	-0.094	0.065	-0.353	0.724	0	0.328		1	0.919
snp45	rs979012		2	-0.012	0.017	-0.046	0.022	-0.678	0.498	0.796	0.027		1	0.919
snp46	rs224333		2	0.02	0.023	-0.026	0.066	0.863	0.388	0	0.449		1	0.919
snp47	rs6090583		2	-0.003	0.018	-0.038	0.032	-0.168	0.866	0	0.563		1	0.919
snp48	rs2294239		2	0.006	0.021	-0.034	0.046	0.302	0.762	0	0.693		1	0.919
snp49	rs1534696		2	0.021	0.017	-0.013	0.055	1.194	0.232	0	0.958		1	0.919
snp50	rs10925060		1	-0.016	0.034	-0.082	0.051	-0.459	0.646	NA	NA		1	0.919
snp51	rs2124969		2	-0.034	0.029	-0.091	0.023	-1.168	0.243	0.276	0.24		1	0.919
snp52	rs1664789		2	-0.023	0.02	-0.063	0.017	-1.137	0.255	0	0.869		1	0.919
snp53	rs17472426		2	-0.008	0.059	-0.124	0.107	-0.144	0.886	0	0.352		1	0.919
snp54	rs1144		2	-0.026	0.02	-0.065	0.012	-1.333	0.182	0	0.631		1	0.919
snp55	rs178420		1	0.003	0.026	-0.047	0.053	0.103	0.918	NA	NA		1	0.919
snp56	rs2047937		2	-0.014	0.016	-0.046	0.018	-0.839	0.402	0.431	0.185		1	0.919
snp57	rs2398893		2	-0.012	0.017	-0.045	0.021	-0.716	0.474	0	0.318		1	0.919
snp58	rs1394461		1	-0.103	0.041	-0.183	-0.024	-2.545	0.011	NA	NA		0.644	0.37
snp59	rs319564		2	0.013	0.018	-0.023	0.049	0.697	0.486	0	0.491		1	0.919
